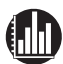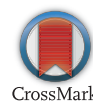

# HLA-A\*24 Carrier Status and Autoantibody Surges Posttransplantation Associate With Poor Functional Outcome in Recipients of an Islet Allograft

Diabetes Care 2016;39:1060–1064 | DOI: 10.2337/dc15-2768

Simke Demeester,<sup>1</sup> Else M. Balke,<sup>1</sup>  
Bart J. Van der Auwera,<sup>1</sup> Pieter Gillard,<sup>1,2</sup>  
Robert Hilbrands,<sup>1</sup> DaHae Lee,<sup>1,2</sup>  
Ursule Van de Velde,<sup>1</sup> Zhidong Ling,<sup>1</sup>  
Bart O. Roep,<sup>3</sup> Daniel G. Pipeleers,<sup>1</sup>  
Frans K. Gorus,<sup>1</sup> and Bart Keymeulen<sup>1</sup>

## OBJECTIVE

We investigated whether changes in islet autoantibody profile and presence of HLA risk markers, reported to predict rapid  $\beta$ -cell loss in pre-type 1 diabetes, associate with poor functional outcome in islet allograft recipients.

## RESEARCH DESIGN AND METHODS

Forty-one patients received  $\geq 2.3$  million  $\beta$ -cells/kg body wt in one to two intra-portal implantations. Outcome after 6–18 months was assessed by C-peptide (random and stimulated), insulin dose, and HbA<sub>1c</sub>.

## RESULTS

Patients carrying HLA-A\*24-positive or experiencing a significant autoantibody surge within 6 months after the first transplantation ( $n = 19$ ) had lower C-peptide levels ( $P \leq 0.003$ ) and higher insulin needs ( $P < 0.001$ ) despite higher HbA<sub>1c</sub> levels ( $P \leq 0.018$ ). They became less often insulin independent (16% vs. 68%,  $P = 0.002$ ) and remained less often C-peptide positive (47% vs. 100%,  $P < 0.001$ ) than recipients lacking both risk factors. HLA-A\*24 positivity or an autoantibody surge predicted insulin dependence ( $P = 0.007$ ).

## CONCLUSIONS

HLA-A\*24 and early autoantibody surge after islet implantation associate with poor functional graft outcome.

The success rate of an intraportal islet graft for achieving insulin independence critically hinges on the amount of donor tissue implanted (1). However, a positive outcome can be counteracted by other factors, including preexisting autoreactive T cells, HLA alloantibodies, or high lymphocyte counts (2–4). In recipients of a sufficiently large intraportal islet allograft (5,6), we investigated whether the presence of HLA-A\*24, HLA-DQ2/DQ8, or rising islet autoantibody levels, previously shown to independently predict rapid  $\beta$ -cell loss in prediabetes (7,8), associates with poor functional graft outcome.

## RESEARCH DESIGN AND METHODS

### Transplant Protocol

Forty-one patients with C-peptide-negative type 1 diabetes (median age 45 years) with a history of recurrent hypoglycemia and negative for preexisting HLA class I and class II antibodies (4) received  $\geq 2.3$  million  $\beta$ -cells ( $\sim 4,600$  islet equivalents)/kg

<sup>1</sup>Diabetes Research Center, Brussels Free University, Brussels, Belgium

<sup>2</sup>Department of Endocrinology, University Hospitals Leuven, Leuven, Belgium

<sup>3</sup>Department of Immunohaematology and Blood Transfusion, Leiden University Medical Center, Leiden, the Netherlands

Corresponding author: Simke Demeester, simke.demeester@uzbrussel.be.

Received 21 December 2015 and accepted 28 March 2016.

This article contains Supplementary Data online at <http://care.diabetesjournals.org/lookup/suppl/doi:10.2337/dc15-2768/-/DC1>.

S.D. and E.M.B. contributed equally as first authors.

F.K.G. and B.K. contributed equally as senior authors.

© 2016 by the American Diabetes Association. Readers may use this article as long as the work is properly cited, the use is educational and not for profit, and the work is not altered.

body wt in one to two intraportal islet implantations (5,6) (clinical trial reg. nos. NCT00798785 and NCT00623610) under antithymocyte globulin-mycophenolate mofetil-tacrolimus therapy. After standardized islet isolation and culture, the cellular composition of the grafts was analyzed before infusion.

### Assays and Outcome Measures

Plasma C-peptide and proinsulin were measured with a time-resolved fluorescence immunoassay (AutoDELFIA; PerkinElmer, Turku, Finland) (9), HbA<sub>1c</sub> levels with high-performance liquid chromatography (Tosoh Bioscience, Tessenlo, Belgium), and lymphocyte subclasses

with an EPICS XL flow cytometer (Beckman Coulter, Miami, FL). Insulin independence was defined as insulin dose  $\leq 8$  units  $\cdot$  kg<sup>-1</sup>  $\cdot$  day<sup>-1</sup> and C-peptide negativity as two consecutive random C-peptide values  $\leq 0.05$  ng/mL. Autoantibodies against GAD (GADA), against IA-2 (IA-2A), and against ZnT8 (ZnT8A) were determined by liquid phase radiobinding assays (10) before the first implantation, 6 weeks and 6 months thereafter, and 6 weeks after the second transplantation, using the 99th percentile of controls as cutoff (10). Significant autoantibody surges were defined according to Decochez et al. (11). Assays were validated by

participation in successive Diabetes Antibody Standardization Programs (10). HLA-DQ2/DQ8 and -A\*24 were determined by allele-specific oligotyping (8). The hyperglycemic clamp procedure was performed as previously described (6). C-peptide measurements at 120, 135, and 150 min of hyperglycemia (180 mg/dL) were used to calculate the C-peptide area under the curve (AUC).

### Statistical Analysis

The data were analyzed with Mann-Whitney *U*,  $\chi^2$ , or Fisher exact tests. Kaplan-Meier analysis with log-rank test and Cox proportional hazards model, performed by forward stepwise method, were

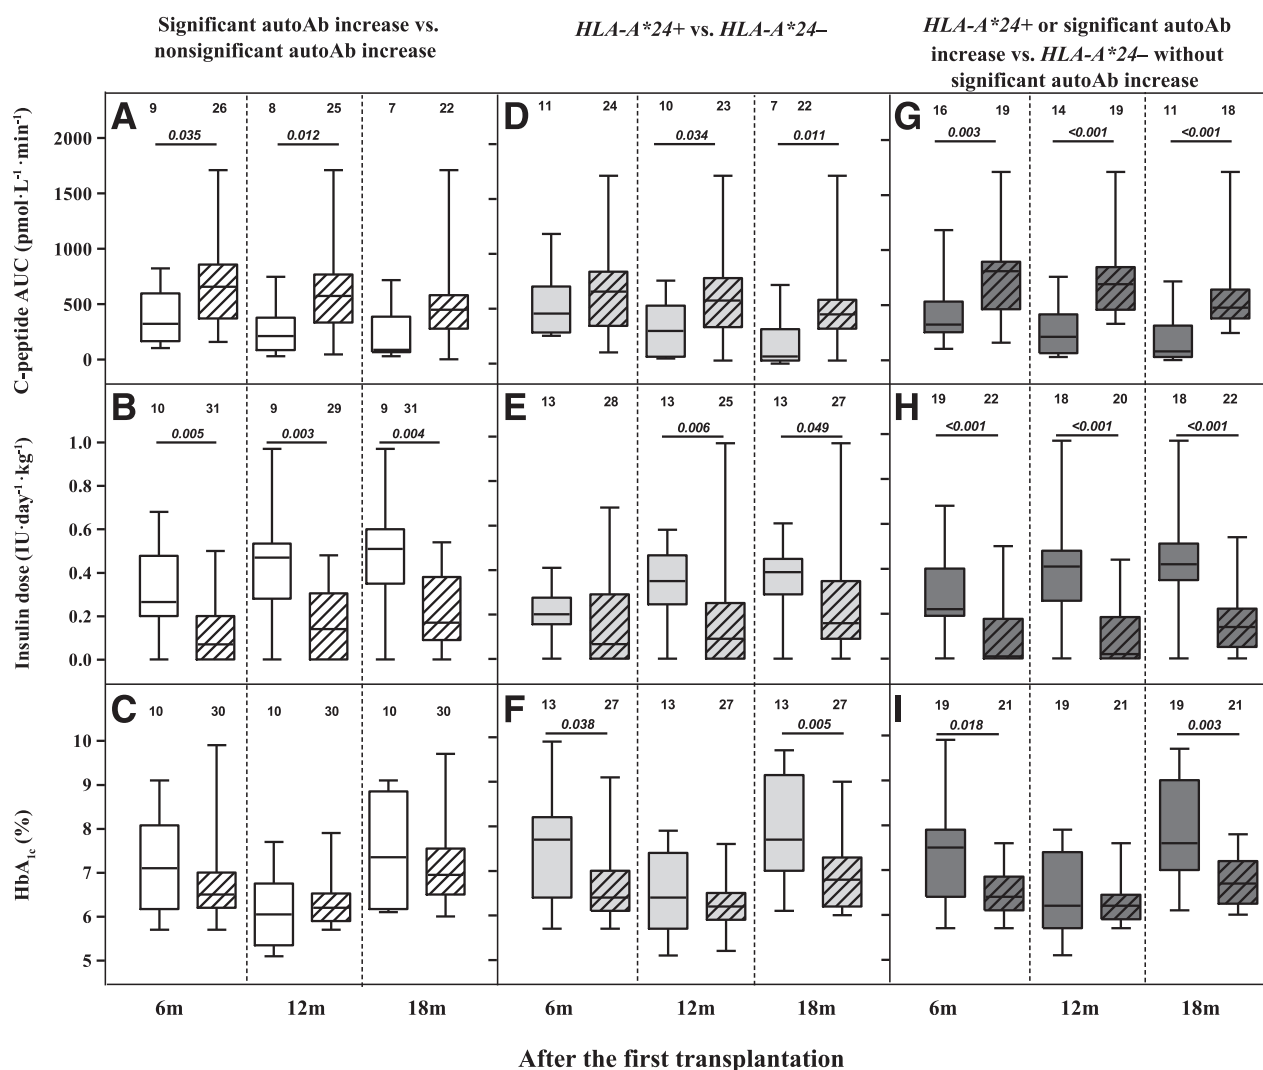

**Figure 1**—AUC C-peptide release measured during hyperglycemic clamp test, insulin dose, and HbA<sub>1c</sub> at 6, 12, and 18 months after the first transplantation. A–C: Patients with (open bars) or without significant autoantibody (autoAb) increase (hatched bars). D–F: Patients who were HLA-A\*24 positive (solid bars) vs. HLA-A\*24 negative (hatched bars). G–I: Patients who were HLA-A\*24 positive or with a significant autoAb increase (solid bars) vs. those who were HLA-A\*24 negative and without a significant autoAb increase (hatched bars). Boxes represent median (interquartile range) and whiskers, minimum and maximum. Threshold for significance  $P < 0.05/27$  or  $P < 0.0019$  (Bonferroni correction for 27 comparisons in Fig. 1). In recipients who were HLA-A\*24 positive, outcome was not influenced by the presence or absence of HLA-DQ2 or -DQ8, hence providing no evidence that the results could be explained by linkage disequilibrium with class II risk haplotypes (data not shown). IU, international units; m, months.

used to assess the development of insulin independence or C-peptide negativity. All tests were performed two sided with SPSS 20 for Windows (IBM Corporation, Chicago, IL).  $P < 0.05$  was considered significant.

## RESULTS

### Immunogenetic Markers of Recipients

Two patients had positive tests for all three autoantibodies, 6 for two (GADA and IA-2A), 18 for one (GADA  $n = 11$ , IA-2A  $n = 4$ , ZnT8A  $n = 3$ ), and 15 for

none. Ten patients experienced a significant increase in autoantibody level, including seven in whom an additional autoantibody developed within 6 months (GADA in five and IA-2A in two) and three with increases of preexisting GADA.

**Table 1—Graft and recipient characteristics of the subgroups according to HLA-A\*24 status in combination with autoantibody increase**

|                                                                  | HLA-A*24 positive or significant autoantibody increase | HLA-A*24 negative without significant autoantibody increase |
|------------------------------------------------------------------|--------------------------------------------------------|-------------------------------------------------------------|
| <b>Recipients</b>                                                |                                                        |                                                             |
| <i>n</i>                                                         | 19                                                     | 22                                                          |
| Age* (years)                                                     | 41 (33–45)                                             | 50 (42–54)†                                                 |
| Sex                                                              |                                                        |                                                             |
| Male                                                             | 10                                                     | 13                                                          |
| Female                                                           | 9                                                      | 9                                                           |
| BMI* (kg/m <sup>2</sup> )                                        | 24.1 (22.9–26.1)                                       | 23.4 (20.9–25.7)                                            |
| Duration of disease (years)                                      | 22 (15–31)                                             | 27 (23–37)                                                  |
| Age at onset (years)                                             | 14 (9–26)                                              | 19 (13–26)                                                  |
| HbA <sub>1c</sub> level*                                         |                                                        |                                                             |
| %                                                                | 8.0 (7.5–8.7)                                          | 7.4 (7.0–8.1)                                               |
| mmol/mol                                                         | 63.9 (58.8–71.6)                                       | 57.4 (52.7–65.3)                                            |
| Insulin dose* (international units/kg/day)                       | 0.53 (0.40–0.75)                                       | 0.51 (0.42–0.68)                                            |
| HLA-DQ2                                                          | 8 (42)                                                 | 11 (50)                                                     |
| HLA-DQ8                                                          | 12 (63)                                                | 15 (68)                                                     |
| HLA-DQ2/DQ8                                                      | 1 (5)                                                  | 6 (27)                                                      |
| HLA-A*24                                                         | 13 (68)                                                | 0 (0)†                                                      |
| HLA-B*18                                                         | 1 (5)                                                  | 3 (14)                                                      |
| HLA-B*39                                                         | 2 (11)                                                 | 0 (0)                                                       |
| <b>Immune status before ATG</b>                                  |                                                        |                                                             |
| T-lymphocyte count (CD3 <sup>+</sup> cells/mm <sup>3</sup> )     | 1,318 (1,101–1,617)                                    | 1,234 (1,052–1,814)                                         |
| B-lymphocyte count (CD19 <sup>+</sup> cells/mm <sup>3</sup> )    | 252 (175–324)                                          | 237 (144–281)                                               |
| Autoantibody positivity                                          |                                                        |                                                             |
| 0 antibodies                                                     | 5 (26)                                                 | 10 (45)                                                     |
| 1 antibody                                                       | 11 (58)                                                | 7 (32)                                                      |
| 2 antibodies                                                     | 2 (11)                                                 | 4 (18)                                                      |
| 3 antibodies                                                     | 1 (5)                                                  | 1 (5)                                                       |
| IAA                                                              | 18 (95)                                                | 21 (95)                                                     |
| GADA                                                             | 7 (37)                                                 | 12 (55)                                                     |
| IA-2A                                                            | 7 (37)                                                 | 5 (23)                                                      |
| ZnT8A                                                            | 4 (22)                                                 | 1 (5)                                                       |
| Autoantibody levels                                              |                                                        |                                                             |
| GADA (WHO units/mL)                                              | 16.8 (5.3–39.9)                                        | 23.9 (5.8–617.0)                                            |
| IA-2A (WHO units/mL)                                             | 1.0 (0.3–8.7)                                          | 0.3 (0.3–7.1)                                               |
| ZnT8A (10 <sup>−3</sup> · index)                                 | 9.7 (4.8–23.5)                                         | 6.4 (1.2–11.9)                                              |
| Significant autoantibody increase within 6 months                | 10 (53)                                                | 0 (0)†                                                      |
| <b>Grafts</b>                                                    |                                                        |                                                             |
| Donor pancreata                                                  | 6 (5–9)                                                | 8 (4–10)                                                    |
| Number of β-cells (× 10 <sup>6</sup> /kg)                        |                                                        |                                                             |
| First graft                                                      | 2.9 (2.6–3.9)                                          | 2.6 (2.2–3.6)                                               |
| Total                                                            | 4.8 (3.7–6.4)                                          | 4.7 (3.7–5.7)                                               |
| Cellular composition (%)                                         |                                                        |                                                             |
| β-Cells                                                          | 28 (24–33)                                             | 26 (20–33)                                                  |
| Acinar cells                                                     | <10                                                    | <10                                                         |
| Nongranulated cells                                              | 49 (43–59)                                             | 52 (45–61)                                                  |
| <b>Immune suppression</b>                                        |                                                        |                                                             |
| Total ATG dose (mg/kg)                                           | 24 (21–24)                                             | 21 (19–24)                                                  |
| Tacrolimus level (AUC · day <sup>−1</sup> over 6 months) (ng/mL) | 9.3 (8.7–9.6)                                          | 9.0 (8.5–9.4)                                               |
| Total MMF dose over 6 months (g)                                 | 311 (278–362)                                          | 317 (289–361)                                               |

Data are *n*, median (interquartile range), or *n* (%). Threshold for significance  $P < 0.05/35$  or  $P < 0.0014$  (Bonferroni correction for 35 comparisons in Table 1). ATG, antithymocyte globulin; IAA, insulin autoantibody; MMF, mycophenolate mofetil; WHO, World Health Organization. \*Determined before the start of induction therapy with ATG (500 β-cells correspond roughly to 1 islet equivalent, but correlation is poor in cultured islet preparation). † $P \leq 0.001$  vs. HLA-A\*24 positivity or significant autoantibody increase.

Thirteen patients carried *HLA-A\*24* and seven *HLA-DQ2/DQ8*.

**Association With Functional Outcome**  
Pretransplant autoantibody levels did not correlate with AUC C-peptide or insulin dose (data not shown). However, patients with an autoantibody surge  $\leq 6$  months after the first implantation ( $n = 10$ ) tended to have lower C-peptide levels and higher insulin doses despite a trend toward higher HbA<sub>1c</sub> during 18 months posttransplantation than patients without such a rise ( $n = 31$ ) (Fig. 1A–C). Likewise, patients positive for *HLA-A\*24* ( $n = 13$ ) experienced lower C-peptide levels and higher insulin doses and HbA<sub>1c</sub> during follow-up than those negative for *HLA-A\*24* ( $n = 28$ ) (Fig. 1D–F). Both groups did not differ in the frequency of receiving a graft containing one or more *HLA-A\*24*-positive donor or in the number of *HLA-A\*24*-positive donors per graft (data not shown). In patients who were positive for *HLA-A\*24* or who experienced an early autoantibody surge ( $n = 19$ ) compared with patients lacking both risk factors, differences in C-peptide level ( $P \leq 0.003$ ), insulin dose ( $P \leq 0.001$ ), and HbA<sub>1c</sub> ( $P \leq 0.018$ ) were strengthened (Fig. 1G–I). Outcome was unaltered by the presence or absence of *HLA-DQ2*, *-DQ8*, or *-DQ2/DQ8* (data not shown).

#### Progression to Insulin Independence and C-Peptide Negativity

Patients without an autoantibody surge more often tended to become insulin independent and to remain C-peptide positive 18 months posttransplantation than those with such a surge (Supplementary Fig. 1A and B); the same applied for patients negative for *HLA-A\*24* versus those positive for *HLA-A\*24* (Supplementary Fig. 1C and D). All recipients lacking both risk factors ( $n = 22$ ) remained C-peptide positive after 18 months ( $P < 0.001$  vs. 47% if one or more risk factors), and 68% of them achieved insulin independence ( $P = 0.002$  vs. 16% if one or more risk factors) (Supplementary Fig. 1E and F).

In the poor response group ( $n = 19$ ) only four patients presented both risk factors (Supplementary Fig. 2); hence, the presence of either one explains a larger fraction of recipients with poor outcome. Progression rates to insulin independence or C-peptide negativity were not different according to the

number of risk factors present (data not shown).

The subgroup with *HLA-A\*24* or autoantibody surge ( $n = 19$ ) did not differ from the rest in patient or graft characteristics except for a lower age and, logically, a higher prevalence of *HLA-A\*24* and autoantibody surges (Table 1). To identify predictors of insulin independence (not performed for the development of C-peptide negativity due to low event numbers) all variables from Table 1 were tested in univariate Cox regression. Those with  $P < 0.1$  (tacrolimus level over first 6 months, baseline HbA<sub>1c</sub>) were entered in a multivariate model together with *HLA-A\*24*/autoantibody surge. Only the latter remained significant ( $P = 0.007$ ; 95% CI for hazard ratio 0.053–0.635).

#### CONCLUSIONS

Recipient *HLA-A\*24* carrier status and autoantibody surges, mostly GADA, within 6 months after the first islet implantation associate with poor functional outcome. The joint absence of both risk factors identified individuals with higher and more persistent C-peptide release, lower insulin dose and HbA<sub>1c</sub>, and higher probability of insulin independence during 18 months than in participants presenting at least one marker. This different outcome could not be explained by differences in recipient age, immune status, graft composition, or immune suppression.

The relatively large size and homogeneity of the cohort is a strength of this study. Nevertheless, our observations could have benefited from larger patient numbers in the subgroups that turned out relevant. All patients received sufficient  $\beta$ -cells to generate plasma C-peptide levels at posttransplantation month 2 in C-peptide-negative recipients (2,5) under similar immunosuppression.

The current results indicate that similar to observations in pre-type 1 diabetes, the presence of *HLA-A\*24* or autoantibody surges predicts  $\beta$ -cell loss during an inflammatory and/or immune process in islet allograft recipients (7,8). The association of early autoantibody rises with poor graft outcome confirms previous observations and has been explained as the consequence of autoantigen release after  $\beta$ -cell death (12). The negative influence of *HLA-A\*24* is, to the best of our knowledge, novel

and consistent with its association with accelerated progression to clinical onset in prediabetes (8). Efficient *HLA-A\*24*-restricted presentation of autoantigen fragments to cytotoxic T cells (13) may play a role in the accelerated functional loss posttransplantation, but *HLA-A\*24* expression on non- $\beta$ -cells is likely to be involved because it is the recipients' *HLA-A\*24* that affects outcome. The combination of *HLA-A\*24* and autoantibody surges is consistent with reports that *HLA-A\*24* associates with attenuated humoral responses to islet autoantigens in prediabetes and diabetes (14). The presence of *HLA-DQ2/DQ8*, another independent predictor of diabetes in risk groups (8), was not associated with poor graft outcome.

In conclusion, in recipients of an intra-portal islet allograft, the presence of *HLA-A\*24* or an early autoantibody surge associates with poor metabolic outcome. Autoantibody monitoring creates a time window during which immunosuppression could be changed or another therapeutic intervention planned. When comparing efficacy of transplantation protocols or prognostic value of novel biomarkers, results should be adjusted for *HLA-A\*24* carrier status.

**Acknowledgments.** The authors thank Monique Robyn, Brigitta Swennen, Katrien Rouffe, and Nadine Pardon (University Hospitals Leuven); Koen Verbeeck, Sofie Vandenhoeck, Soniya Thomas, and Jenny Van Den Brande (University Hospitals Brussels); and Rie Braspenning (Antwerp University Hospital) for completing all clamp tests. The authors also thank the Eurotransplant International Foundation and its transplant surgeons and coordinators for organ procurement. Finally, the authors thank the staff of the Beta-Cell Bank, the Belgian Diabetes Registry, the Diabetes Research Center of the Vrije Universiteit Brussel, and the Clinical Biology Department of the University Hospital Brussels.

**Funding.** This study was supported by the JDRF (grant 4/2005/1327) and the W. Gepts Fund of University Hospitals Brussels. P.G. is funded by the Clinical Research Foundation of the University Hospitals Leuven, Katholieke Universiteit Leuven. B.K. is senior clinical investigator of the Research Foundation Flanders (Fonds Wetenschappelijk Onderzoek-Vlaanderen).

**Duality of Interest.** No potential conflicts of interest relevant to this article were reported.

**Author Contributions.** S.D. and F.K.G. contributed to the study design, literature search, data collection, data analysis and interpretation, and writing of the manuscript. E.M.B. contributed to the study design, literature search, and data collection,

analysis, and interpretation. B.J.V.d.A., P.G., R.H., D.L., U.V.d.V., and Z.L. researched data and reviewed the manuscript. B.O.R. contributed to the data research, discussion, and review and editing of the manuscript. D.G.P. contributed to the discussion and editing of the manuscript. B.K. contributed to the study design, literature search, data collection, data analysis and interpretation, discussion, and editing of the manuscript. F.K.G. and B.K. are the guarantors of this work and, as such, had full access to all the data in the study and take responsibility for the integrity of the data and the accuracy of the data analysis.

## References

- Robertson RP. Islet transplantation for type 1 diabetes, 2015: what have we learned from alloislet and autoislet successes? *Diabetes Care* 2015;38:1030–1035
- Hilbrands R, Huurman VA, Gillard P, et al. Differences in baseline lymphocyte counts and autoreactivity are associated with differences in outcome of islet cell transplantation in type 1 diabetic patients. *Diabetes* 2009;58:2267–2276
- Campbell PM, Salam A, Ryan EA, et al. Pretransplant HLA antibodies are associated with reduced graft survival after clinical islet transplantation. *Am J Transplant* 2007;7:1242–1248
- Huurman VA, Hilbrands R, Pinkse GG, et al. Cellular islet autoimmunity associates with clinical outcome of islet cell transplantation. *PLoS One* 2008;3:e2435
- Keymeulen B, Gillard P, Mathieu C, et al. Correlation between beta cell mass and glycemic control in type 1 diabetic recipients of islet cell graft. *Proc Natl Acad Sci U S A* 2006;103:17444–17449
- Gillard P, Hilbrands R, Van de Velde U, et al. Minimal functional  $\beta$ -cell mass in intraportal implants that reduces glycemic variability in type 1 diabetic recipients. *Diabetes Care* 2013;36:3483–3488
- Insel RA, Dunne JL, Atkinson MA, et al. Staging presymptomatic type 1 diabetes: a scientific statement of JDRF, the Endocrine Society, and the American Diabetes Association. *Diabetes Care* 2015;38:1964–1974
- Mbunwe E, Van der Auwera BJ, Vermeulen I, et al.; Belgian Diabetes Registry. HLA-A\*24 is an independent predictor of 5-year progression to diabetes in autoantibody-positive first-degree relatives of type 1 diabetic patients. *Diabetes* 2013;62:1345–1350
- De Pauw PE, Vermeulen I, Ubani OC, et al. Simultaneous measurement of plasma concentrations of proinsulin and C-peptide and their ratio with a trefoil-type time-resolved fluorescence immunoassay. *Clin Chem* 2008;54:1990–1998
- Demeester S, Keymeulen B, Kaufman L, et al. Preexisting insulin autoantibodies predict efficacy of oteelixumab in preserving residual  $\beta$ -cell function in recent-onset type 1 diabetes. *Diabetes Care* 2015;38:644–651
- Decochez K, Tits J, Coolens JL, et al. High frequency of persisting or increasing islet-specific autoantibody levels after diagnosis of type 1 diabetes presenting before 40 years of age. The Belgian Diabetes Registry. *Diabetes Care* 2000;23:838–844
- Bosi E, Braghi S, Maffi P, et al. Autoantibody response to islet transplantation in type 1 diabetes. *Diabetes* 2001;50:2464–2471
- Kronenberg D, Knight RR, Estorninho M, et al. Circulating preproinsulin signal peptide-specific CD8 T cells restricted by the susceptibility molecule HLA-A24 are expanded at onset of type 1 diabetes and kill  $\beta$ -cells. *Diabetes* 2012;61:1752–1759
- Ye J, Long AE, Pearson JA, et al. Attenuated humoral responses in HLA-A\*24-positive individuals at risk of type 1 diabetes. *Diabetologia* 2015;58:2284–2287
